# Supplementary material for: Autistic parents’ views and experiences of talking about autism with their autistic children
Source: PubMed Central journal article supplement — Autism. 2021 Jan 4;25(4):1161–7. doi: 10.1177/1362361320981317 (PMC8111227; doi:10.1177/1362361320981317), 2021-01-04
Supplement: sj-pdf-1-aut-10.1177_1362361320981317.pdf [file sj-pdf-1-aut-10.1177_1362361320981317.pdf]

## Supplementary Material: Copy of survey

### Title: Talking about Autism: autistic parents' experiences of talking about autism with their children

#### Section One:

*To start, we want to ask some questions about you...*

#### **Q1. Are you autistic?**

- Yes (I have a formal diagnosis)
- Yes (I self-identify as autistic)
- No (I am not autistic)

*[Skip To: End of Survey if selected]*

#### **Q2. Do you have at least one child on the autism spectrum who is under the age of 18 years?**

- Yes
- No

*[Skip To: End of Survey if selected]*

#### **Q3. Are you currently living in the United Kingdom?**

- Yes
- No

*[Skip To: End of Survey if selected]*

#### **Q4. How old are you?**

[Drop down selection box including ages 18-70+]

#### **Q5. What is your gender identity?**

- Male (including transgender male)
- Female (including transgender female)
- Non-binary
- Other (please specify) \_\_\_\_\_

#### **Q6. What is your ethnicity?**

- White (including British, Irish, or any other White background)
- Black or Black British Caribbean (including Caribbean, African or any other Black background)
- Asian or Asian British (including Indian, Pakistani, Bangladeshi or any other Asian background)
- Chinese or any other ethnic group
- Prefer not to say
- Other (please give details) \_\_\_\_\_

#### **Q7. Where in the UK do you live?**

- East of England
- East Midlands
- London
- North East

- North West
- Northern Ireland
- Scotland
- South East
- South West
- Wales
- West Midlands
- Yorkshire and the Humber

**Section Two:**

*Now we'd like to ask about your family (children and partner) ...*

**Q8. How many children (of any age) do you have?**

[Drop down selection box including 1-7+ children]

**Q9. How many of your children (of any age) are on the autism spectrum?**

[Drop down selection box including 1-7 children]

**Q10. In what order did your family receive their autism diagnoses? (e.g., 1. My first child, 2. My partner, 3. My third child)**

---



---



---

**Q11. Do your children (autistic or non-autistic) know about *your* autism diagnosis?**

Yes (Please tell us more about this if you would like)

---



---

No (Please tell us more about this if you would like)

---



---

It's complicated (Please explain)

---



---

**Section Three:**

*Now we'd like to ask about your eldest child (under the age of 18 years) on the autism spectrum.*

**Q12. What is your child's gender identity?**

Male

Female

Other (please give details) \_\_\_\_\_

**Q13. How old was your child when they received their autism diagnosis?**

[Drop down selection box including 0-18 years old]

**Q14. How old is your child now?**

[Drop down selection box including 0-18 years old]

**Q15. What is your child's diagnosis?**

- Autism
- Autism spectrum disorder/condition
- Asperger's syndrome/disorder
- High-functioning autism
- Pervasive Developmental Disorder – Not Otherwise Specified
- Other (please give details) \_\_\_\_\_

**Q16. Does your child have any other diagnoses? (Please choose all that apply)**

- No
- A physical disability (including epilepsy and hearing or vision impairment)
- A learning disability (including dyslexia)
- An intellectual disability
- An affective condition (including depression and anxiety)
- A behavioural condition (including ADHD, conduct disorder, Tourette syndrome)
- A mental health condition (including bipolar disorder, OCD, schizophrenia)
- A genetic condition (including Fragile X syndrome)
- Any other condition (please give details) \_\_\_\_\_

**Q17. Describe your child's use of spoken language.**

- Language use is completely typical
- There are difficulties mainly with "pragmatic (i.e., social) language"
- Little or no spoken language

**Q18. If you would like to tell us more about this, please do so in the box below.**

---

---

---

**Q19. Where has your child received the majority of their education?**

- Mainstream school
- Specialist unit/base within a mainstream school
- Specialist school
- Home school
- Not applicable
- Other (please give details) \_\_\_\_\_

**Section Four:**

*Now we'd like to ask about if/how your child found out about their autism diagnosis. (If you have more than one autistic child, please tell us about your experiences with your **eldest** child under the age of 18 years.)*

**Q20. Does your child know about their autism diagnosis?**

- Yes, I told them
- Yes, someone else told them
- Yes, I think they know (but I haven't actually told them)
- No, they do not know (or do not understand)

**Q21. If you would like to tell us more about this, please do so in the box below.**

---

---

---

**Q22. How satisfied were you with the way in which your child's diagnosis was disclosed to them? Please note: we are interested in how your child's diagnosis was explained to them, not the diagnostic process overall.**

*[Only display this question if the participant selected "Yes, I told them or "Yes, someone else told them" in response to Q20]*

- Extremely satisfied
- Somewhat satisfied
- Neither satisfied or dissatisfied
- Somewhat dissatisfied
- Extremely dissatisfied

**Q.23 Do any of your other autistic children know about their diagnosis?**

- Yes, I told them
- Yes, someone else told them
- Yes, I think they know (but I haven't actually told them)
- No, they do not know (or do not understand)
- I do not have any other autistic children

**Q24. If you would like to tell us more about this, please do so in the box below.**

---

---

---

**Q25. How satisfied were you with the way in which your child's diagnosis was disclosed to them?**

*[Only display this question if the participant selected "Yes, I told them or "Yes, someone else told them" in response to Q23]*

- Extremely satisfied
- Somewhat satisfied
- Neither satisfied or dissatisfied
- Somewhat dissatisfied
- Extremely dissatisfied

**Q26. Was there anything that was particularly *positive/helpful* about these discussions?**

*[Only display this question if the participant selected "Yes, I told them or "Yes, someone else told them" in response to Q20 and/or Q23]*

---

---

---

**Q27. Was there anything that was *negative/unhelpful* about these discussions? Or perhaps something that you felt could have been done better/differently?**

*[Only display this question if the participant selected “Yes, I told them or “Yes, someone else told them” in response to Q20 and/or Q23]*

---

---

**Section Five:**

**Q28. Did you receive any support in talking to your children (autistic or non-autistic) about autism?**

- Yes
- No

**Q29. How useful was this support?**

*[Only display this question if the participant selected “Yes” in response to Q28]*

- Extremely useful
- Very useful
- Moderately useful
- Slightly useful
- Not at all useful

**Q30. Would you like to have any support in talking to your children about autism?**

*[Only display this question if the participant selected “No” in response to Q28]*

- Yes
- Maybe
- No

**Q.31 If you would like to tell us more about this, please do so in the box below.**

---

---

**Section Six:**

*Now, we’d like to ask you about your day-to-day conversations with your children (both autistic and non-autistic) about autism.*

*If you have autistic and non-autistic children, we’re especially interested in learning whether there is anything different about the way you talk to your autistic and non-autistic children.*

**Q32. If you talk about autism with your children, what kind of things do you talk about? If you prefer, please give an example of a particular discussion you had about autism with your child.**

---

---

---

**Q33. Which terms do you use when talking about autism in your family? (Please choose all that apply)**

- Person with autism
- Has autism
- Autistic person
- Autistic
- On the autism spectrum
- On the autistic spectrum
- Autism spectrum disorder
- Autism spectrum condition
- High-functioning
- Low-functioning
- Asperger syndrome
- Has Asperger syndrome
- Aspergic
- Aspie

**Q34. Is there anything else you'd like to tell us about the terms you use to talk about autism?**

---

---

---

**Q35. Is there anything particularly *positive* about your discussions about autism that you can tell us about?**

---

---

---

**Q36. Is there anything you feel could be done *better/differently* regarding your discussions about autism with your children?**

---

---

---

**Q37. Has your experience as an autistic person (and learning about your own diagnosis) influenced the way you talk to your children about autism? If so, how?**

---

---

---

**Q38. What advice would you give to other parents (autistic or non-autistic) who want to talk to their children about autism?**

---

---

---

**Q39. Before we end the survey, is there anything further you would like to add about your experiences?**

---

---

---

*- End of Survey -*
